# Supplementary material
Source: publisher figshare collection journal article supplement (https://tandf.figshare.com/ndownloader/files/36011584)
Supplement: Supplementary file 1 [file 36011584]

## Sheet: table 9
Table S10：GO analysis of co-expressed genes of lncRNAs
GO_accession	Description	Term_type	Over_represented_pValue	Corrected_pValue	CAD_item	CAD_list	Bg_item	Bg_list
GO:2001256	regulation of store-operated calcium entry	biological_process	0.1414	1	6	150942	8	18240
GO:2001233	regulation of apoptotic signaling pathway	biological_process	0.49344	1	3	150942	5	18240
GO:2001141	regulation of RNA biosynthetic process	biological_process	0.16521	1	1139	150942	2211	18240
GO:2001070	starch binding	molecular_function	0.75655	1	4	150942	10	18240
GO:2001057	reactive nitrogen species metabolic process	biological_process	0.64937	1	5	150942	11	18240
GO:2001056	positive regulation of cysteine-type endopeptidase activity	biological_process	0.31838	1	7	150942	11	18240
GO:2001020	regulation of response to DNA damage stimulus	biological_process	0.49196	1	2	150942	3	18240
GO:2000575	negative regulation of microtubule motor activity	biological_process	0.68274	1	1	150942	2	18240
GO:2000574	regulation of microtubule motor activity	biological_process	0.68274	1	1	150942	2	18240
GO:2000401	regulation of lymphocyte migration	biological_process	0.77017	1	2	150942	5	18240
GO:2000242	negative regulation of reproductive process	biological_process	0.12511	1	3	150942	3	18240
GO:2000241	regulation of reproductive process	biological_process	0.12511	1	3	150942	3	18240
GO:2000146	negative regulation of cell motility	biological_process	0.96236	1	1	150942	5	18240
GO:2000145	regulation of cell motility	biological_process	0.22913	1	18	150942	31	18240
GO:2000123	positive regulation of stomatal complex development	biological_process	0.51039	1	3	150942	5	18240
GO:2000117	negative regulation of cysteine-type endopeptidase activity	biological_process	0.80099	1	4	150942	10	18240
GO:2000116	regulation of cysteine-type endopeptidase activity	biological_process	0.50973	1	11	150942	21	18240
GO:2000113	negative regulation of cellular macromolecule biosynthetic process	biological_process	0.15648	1	43	150942	75	18240
GO:2000112	regulation of cellular macromolecule biosynthetic process	biological_process	0.12784	1	1158	150942	2242	18240
GO:2000104	negative regulation of DNA-dependent DNA replication	biological_process	0.12143	1	3	150942	3	18240
GO:2000038	regulation of stomatal complex development	biological_process	0.51039	1	3	150942	5	18240
GO:2000027	regulation of organ morphogenesis	biological_process	0.55798	1	2	150942	3	18240
GO:2000026	regulation of multicellular organismal development	biological_process	0.044855	0.71626	29	150942	45	18240
GO:1902209	negative regulation of bacterial-type flagellum assembly	biological_process	0.97193	1	1	150942	5	18240
GO:1902208	regulation of bacterial-type flagellum assembly	biological_process	0.7397	1	4	150942	9	18240
GO:1902116	negative regulation of organelle assembly	biological_process	0.97193	1	1	150942	5	18240
GO:1902115	regulation of organelle assembly	biological_process	0.7397	1	4	150942	9	18240
GO:1902100	negative regulation of metaphase/anaphase transition of cell cycle	biological_process	0.65156	1	13	150942	27	18240
